# Supplementary material for: Metabolic acid-base adaptation triggered by acute persistent hypercapnia in mechanically ventilated patients with acute respiratory distress syndrome
Source: PubMed Central journal article supplement (PMC4828087; doi:10.5935/0103-507x.20160009), 2016
Supplement: rbti-28-01-0019-suppl01.pdf [file rbti-28-01-0019-suppl01.pdf]

# Metabolic acid-base adaptation triggered by acute persistent hypercapnia in mechanically ventilated patients with acute respiratory distress syndrome

*Adaptação metabólica diante de hipercapnia persistente aguda em pacientes submetidos à ventilação mecânica por síndrome do desconforto respiratório agudo*

Thiago Gomes Romano, Mario Diego Teles Correia, Pedro Vitale Mendes, Fernando Godinho Zampieri, Alexandre Toledo Maciel, Marcelo Park

**Table 1S** - Other physiological and laboratorial variables of patients during the observational period

| Variable                               | Group       | Admission        | Day -1                       | Day 0                        | Day 1                      | Day 2                        | Day 3                      | p-value              |
|----------------------------------------|-------------|------------------|------------------------------|------------------------------|----------------------------|------------------------------|----------------------------|----------------------|
| Maximal heart rate (beats/min)         | Hypercapnic | 115 [111,120]    | 115 [100,118]                | 115 [115,120]                | 115 [114,121]              | 115 [96,123]                 | 115 [98,128]               | 0.081 <sup>§</sup>   |
|                                        | Control     | 115 [115,128]    | 115 [110,125]                | 115 [109,121]                | 115 [115,115]              | 115 [115,124]                | 115 [114,130]              | 0.149 <sup>§</sup>   |
| Maximal respiratory rate (breaths/min) | Hypercapnic | 26 [24,28]       | 26 [26,28]                   | 26 [26,31]                   | 26 [26,34]                 | 26 [26,37]                   | 27 [26,33]                 | 0.151 <sup>§</sup>   |
|                                        | Control     | 26 [24,31]       | 28 [24,34]                   | 26 [25,36]                   | 26 [25,32]                 | 26 [26,36]                   | 26 [26,36]                 | 0.137 <sup>§</sup>   |
| Maximal ABPm (mmHg)                    | Hypercapnic | 96 [93,96]       | 96 [90,96]                   | 96 [96,97]                   | 100 [96,117]               | 101 [96,110]                 | 105 [93,112]               | 0.380 <sup>§</sup>   |
|                                        | Control     | 96 [96,116]      | 104 [94,112]                 | 103 [88,114]                 | 111 [96,115]               | 96 [95,121]                  | 110 [96,118]               | 0.551 <sup>§</sup>   |
| Maximal temperature (°C)               | Hypercapnic | 37.0 [36.5,37.9] | 37.2 [36.7,37.6]             | 37 [36.7,37.6]               | 37 [36.7,37.7]             | 37 [36.5,37.5]               | 37 [36.7,37.8]             | 0.163 <sup>§</sup>   |
|                                        | Control     | 37.2 [36.8,37.9] | 37.2 [37,37.7]               | 37.9 [37,37175]              | 37.2 [36.9,37.7]           | 37.2 [37,37.5]               | 37 [36.9,37.5]             | 0.388 <sup>§</sup>   |
| Cumulative fluid balance (mL)          | Hypercapnic | 286 [-157,704]   | 504 [-560,1697]              | 1225 [-768,3100]             | 1560 [75,3821]             | 1889 [35,4191]               | 1978 [-1635,4421]          | 0.371 <sup>§</sup>   |
|                                        | Control     | 448 [-108,832]   | 754 [195,1088]               | 1232 [-307,1816]             | 1387 [-596,2814]           | 1574 [-1551,3314]            | 2134 [-1688,3881]          | 0.130 <sup>§</sup>   |
| Diuresis (mL)                          | Hypercapnic | 1032 [400,1534]  | 1210 [941,1770]              | 1335 <sup>#</sup> [925,1695] | 1025 [776,1484]            | 1225 [1054,1986]             | 1155 [918,1776]            | 0.004 <sup>§</sup>   |
|                                        | Control     | 1020 [450,1345]  | 1240 [695,1569]              | 1335 [852,2215]              | 1100 [995,1445]            | 1900 [1030,2475]             | 1200 [1030,2515]           | 0.457 <sup>§</sup>   |
| Total SOFA                             | Hypercapnic | 5 [3,7]          | 5 [3,7]                      | 4 [2,7]                      | 3 [1,6]                    | 4 [2,7]                      | 3 [1,6]                    | 0.082 <sup>§</sup>   |
|                                        | Control     | 5 [3,8]          | 4 [3,4]                      | 2 [1,4]                      | 4 [2,4]                    | 4 [2,8]                      | 4 [2,7]                    | 0.610 <sup>§</sup>   |
| Hemoglobin (g/dL)                      | Hypercapnic | 10.6 [10.1,11.2] | 10.2 [9.3,10.7]              | 11.0 [8.6,12.8]              | 9.9 [8.5,12.1]             | 10.0 <sup>*</sup> [8.2,12.0] | 10.0 [8.0,11.4]            | 0.135 <sup>§</sup>   |
|                                        | Control     | 10.0 [8.5,11.9]  | 9.5 [8.2,11.1]               | 9.9 [8.5,11.8]               | 8.3 [7.7,10.7]             | 8.7 [7.6,11.1]               | 8.9 [7.4,11.0]             | 0.047 <sup>§</sup>   |
| BUN (mg/dL)                            | Hypercapnic | 23 [16,27]       | 23 <sup>#</sup> [16,33]      | 24 <sup>#</sup> [17,34]      | 24 <sup>#</sup> [18,36]    | 26 <sup>#</sup> [18,38]      | 27 <sup>#</sup> [20,37]    | < 0.001 <sup>§</sup> |
|                                        | Control     | 23 [10,34]       | 24 [11,34]                   | 24 [11,33]                   | 25 [12,46]                 | 22 [16,48]                   | 26 [22,40]                 | 0.625 <sup>§</sup>   |
| Creatinine (mg/dL)                     | Hypercapnic | 0.8 [0.5,0.9]    | 0.7 [0.5,0.9]                | 0.7 [0.4,1]                  | 0.7 [0.5,0.8]              | 0.6 [0.5,0.8]                | 0.6 [0.4,0.9]              | 0.140 <sup>§</sup>   |
|                                        | Control     | 0.9 [0.7,1.2]    | 1.0 [0.7,1.6]                | 0.8 [0.7,1.8]                | 0.8 [0.7,1.5]              | 0.8 [0.6,1.3]                | 0.8 [0.6,1.2]              | 0.101 <sup>§</sup>   |
| Calcium (mMol/L)                       | Hypercapnic | 1.2 [1.1,1.2]    | 1.2 <sup>#</sup> * [1.1,1.2] | 1.2 <sup>#</sup> * [1.1,1.2] | 1.2 * [1.1,1.2]            | 1.2 [1.2,1.2]                | 1.2 [1.1,1.2]              | 0.003 <sup>§</sup>   |
|                                        | Control     | 1.1 [1.1,1.2]    | 1.1 [1.1,1.2]                | 1.1 [1.1,1.2]                | 1.1 [1.1,1.2]              | 1.2 <sup>#</sup> [1.1,1.2]   | 1.2 <sup>#</sup> [1.1,1.2] | 0.006 <sup>§</sup>   |
| Phosphate (mg/dL)                      | Hypercapnic | 3.7 [2.7,5.3]    | 3.5 [2.6,4.2]                | 3.5 <sup>#</sup> * [2.6,4.2] | 2.8 <sup>#</sup> [2.4,3.7] | 3.0 <sup>#</sup> [2.3,6]     | 3.2 <sup>#</sup> [2.4,4.1] | 0.034 <sup>§</sup>   |
|                                        | Control     | 4.5 [3.2,4.7]    | 4.3 [3.2,4.7]                | 4.1 <sup>#</sup> [2.8,4.7]   | 3.5 <sup>#</sup> [2.7,4.7] | 3.1 <sup>#</sup> [2.6,4.5]   | 3.3 <sup>#</sup> [2.5,4]   | 0.017 <sup>§</sup>   |
| Magnesium (mg/dL)                      | Hypercapnic | 1.9 [1.8,2.1]    | 1.9 [1.8,2.0]                | 2.1 <sup>#</sup> * [1.9,2.4] | 2.0 <sup>#</sup> [1.9,2.2] | 2.0 [1.9,2.3]                | 2.1 [1.9,2.3]              | < 0.001 <sup>§</sup> |
|                                        | Control     | 1.8 [1.6,2]      | 1.8 [1.6,2.1]                | 1.8 [1.6,2.1]                | 1.8 [1.7,2.2]              | 2.0 [1.7,2.2]                | 2 [1.8,2.2]                | < 0.001 <sup>§</sup> |
| Potassium (mMol/L)                     | Hypercapnic | 4.0 [3.4,4.5]    | 3.7 [3.6,4.1]                | 4.0 [3.5,4.4]                | 4.0 * [3.6,4.5]            | 3.7 [3.3,4.0]                | 3.7 [3.4,4.0]              | < 0.001 <sup>§</sup> |
|                                        | Control     | 3.7 [3.4,4.2]    | 3.7 [3.4,4.2]                | 3.6 [3.4,4.1]                | 3.4 [3.3,3.8]              | 3.3 <sup>#</sup> [3.1,3.8]   | 3.8 <sup>#</sup> [3.2,4.0] | 0.498 <sup>§</sup>   |
| P/F ratio (mmHg)                       | Hypercapnic | 172 [138,218]    | 248 [196,329]                | 195 [160,302]                | 215 [196,277]              | 229 [160,297]                | 210 [170,266]              | 0.084 <sup>§</sup>   |
|                                        | Control     | 184 [150,249]    | 249 [150,303]                | 234 [146,306]                | 213 [174,327]              | 231 [201,376]                | 249 [176,337]              | 0.484 <sup>§</sup>   |

ABPm - arterial blood pressure medium; SOFA - sequential organ failure assessment; BUN - blood urea nitrogen. <sup>§</sup> p-value mixed model fixed effects for within-group factor analysis; <sup>\*</sup> p-value mixed model fixed effects for between-group factor analysis; <sup>#</sup> Mann-Whitney's post-hoc analysis p < 0.05 versus control group; and <sup>\*</sup> Wilcoxon's post-hoc analysis p < 0.05 versus admission.

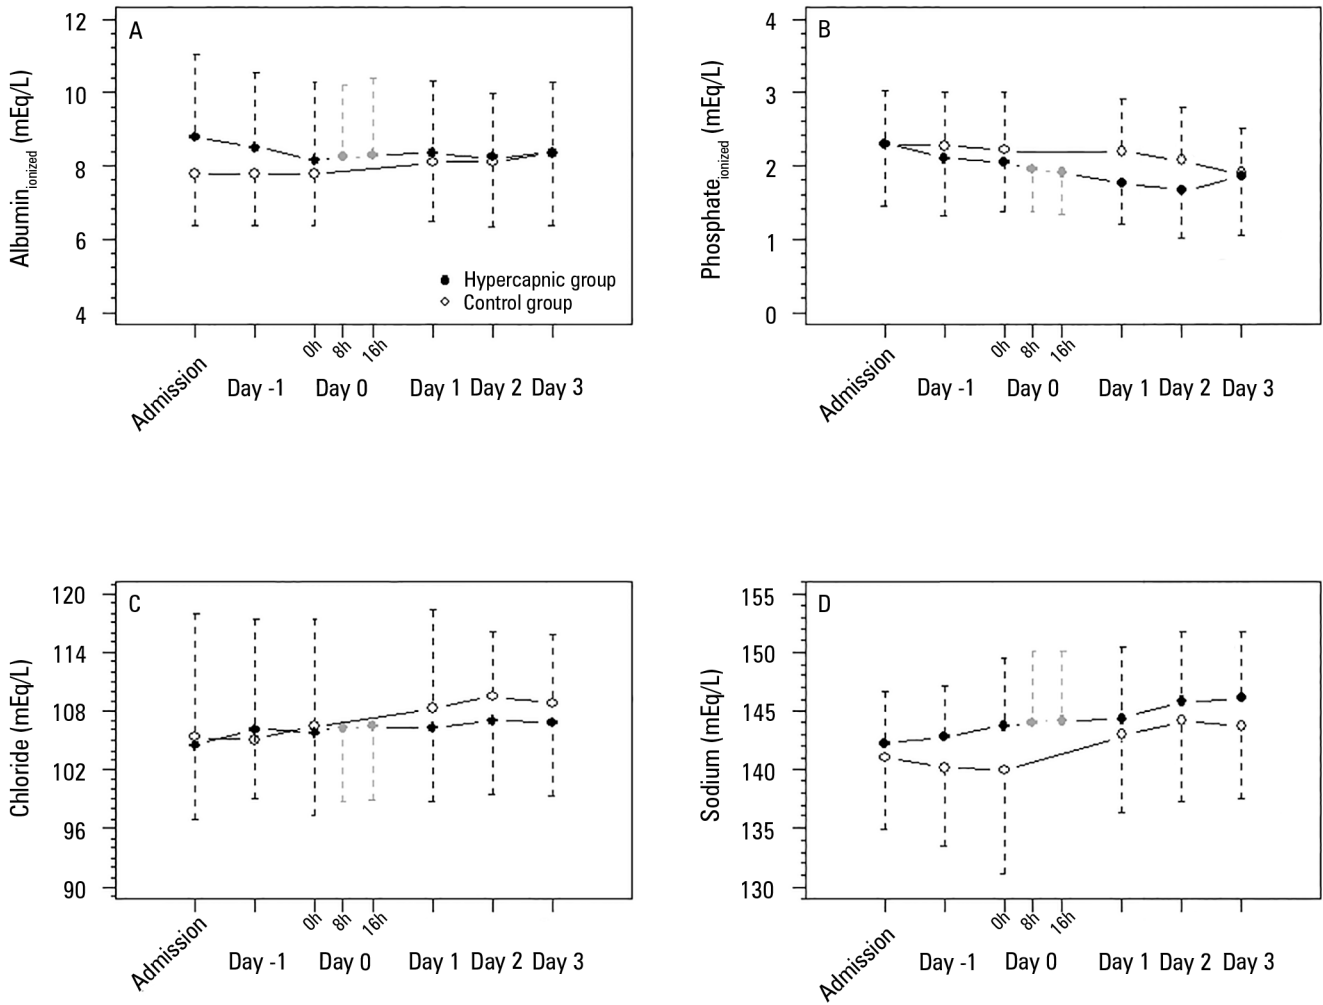

**Figure 1S** - Physicochemical variables of the acid-base metabolic component before and after hypercapnia initiation. A) Ionized albumin evolution (mixed model fixed effects  $p < 0.001$  for within-group factor analysis,  $p = 0.021$  for between-group factor analysis, and  $p = 0.001$  for group  $\times$  time interaction analysis). B) Ionized phosphate evolution (mixed model fixed effects  $p = 0.048$  for within-group factor analysis,  $p = 0.018$  for between-group factor analysis, and  $p = 0.009$  for group  $\times$  time interaction analysis). C) Chloride evolution (mixed model fixed effects  $p = 0.003$  for within-group factor analysis,  $p = 0.744$  for between-group factor analysis, and  $p = 0.058$  for group  $\times$  time interaction analysis). D) Sodium evolution (mixed model fixed effects  $p < 0.001$  for within-group factor analysis,  $p = 0.027$  for between-group factor analysis, and  $p = 0.186$  for group  $\times$  time interaction analysis). \* Mann-Whitney's post-hoc analysis  $p < 0.05$  versus control group. # Wilcoxon's post-hoc analysis  $p < 0.05$  versus admission day.

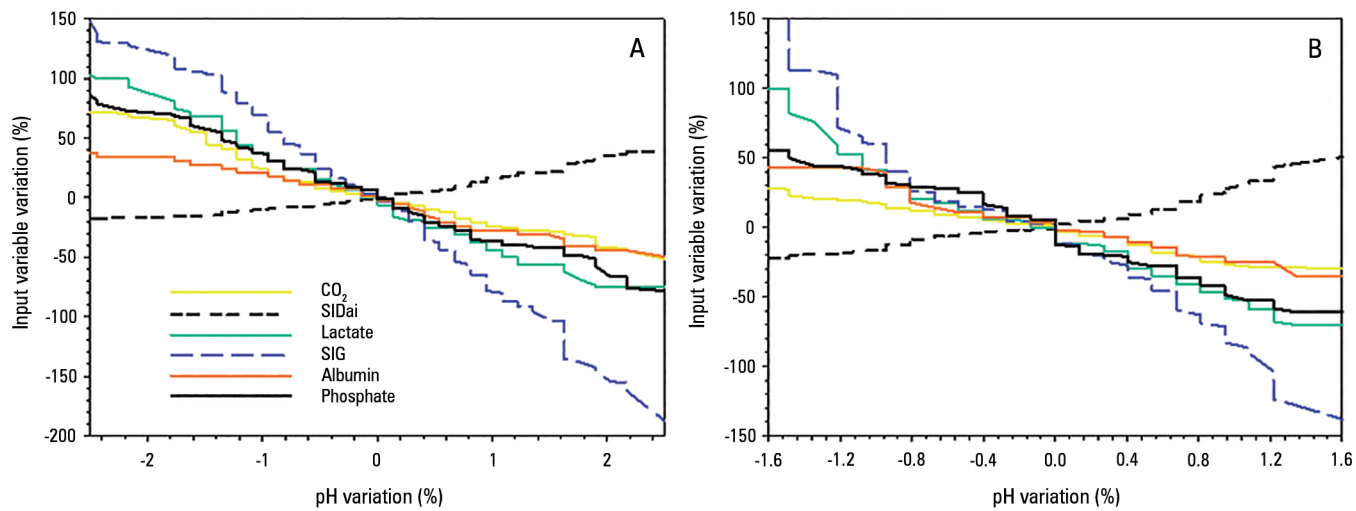

**Figure 2S** - Spider plots exploring the percentual variation in pH relative to the variations in the respiratory and metabolic determinants of pH. A) Variations in hypercapnic group. B) Variations in the control group. SIDai - inorganic apparent strong ion difference; SIG - strong ion gap.
